# Supplementary material for: A DAC tartrate-based gelator system featuring markedly improved gelation properties: enhancing lifetime and functionality of gel networks
Source: Royal Society of Chemistry journal article supplement (doi:10.1039/c5ce00397k), 2015-01-01

# *Supporting Information*

## **A DAC tartrate-based gelator system featuring markedly improved gelation properties: enhancing lifetime and functionality of gel networks**

Eva-Maria Schön,<sup>a</sup> Stefano Roelens,<sup>b</sup> and David Díaz Díaz<sup>\*a,c</sup>

<sup>a</sup> *Institut für Organische Chemie, Universität Regensburg, Universitätsstr. 31, 93040 Regensburg, Germany. E-mail: David.Diaz@chemie.uni-regensburg.de; Fax: + 49 941 9434121; Tel.: + 49 941 9434373*

<sup>b</sup> *Istituto di Metodologie Chimiche (IMC), Consiglio Nazionale delle Ricerche (CNR), Dipartimento di Chimica, Università di Firenze, Via della Lastruccia 13, I-50019 Sesto Fiorentino, Firenze, Italy*

<sup>c</sup> *IQAC-CSIC, Jordi Girona 18-26, 08034 Barcelona, Spain*

**Contents List**

|                                                                                     | <u>pag</u> |
|-------------------------------------------------------------------------------------|------------|
| 1. Two-variables screening for the optimization of MGS-II .....                     | S3         |
| 2. Screening of experimental conditions for the formation of gels with MGS-II ..... | S3         |
| 3. Additional pictures of gels prepared with MGS gelators .....                     | S3         |
| 4. Effect of additional water on the stability of the gels .....                    | S4         |
| 5. Differential scanning calorimetry .....                                          | S6         |
| 6. Structure-property relationships of MGS-II .....                                 | S6         |
| 7. Additional pictures of <i>gel-to-crystal</i> transitions .....                   | S8         |
| 8. Rheological experiments .....                                                    | S8         |
| 9. Characterization of <b>2</b> and <b>3</b> .....                                  | S9         |

## 1. Two-variables screening for the optimization of MGS-II

**Table S1** 2D-Matrix showing the concentration of DAC tartrate **1** in DMSO [M] and the amount of HCl (equivalents with respect to **1**) necessary to prepare a transparent and stable MGS-II solution.<sup>a</sup>

| [M]↓/HCl⇒ | 1.9    | 2.0    | 2.1   | 2.2   | 2.3      | 2.4   | 2.5   |
|-----------|--------|--------|-------|-------|----------|-------|-------|
| 0.08      | I (30) | I (60) | S (5) | S (2) | S (10 s) | S (0) | S (0) |
| 0.10      | I (30) | I (60) | S (5) | S (2) | S (10 s) | S (0) | S (0) |
| 0.128     | I (30) | S (60) | S (5) | S (2) | S (10 s) | S (0) | S (0) |
| 0.20      | I (60) | S (30) | S (5) | S (2) | S (10 s) | S (0) | S (0) |
| 0.20      | I (60) | S (5)  | S (5) | S (2) | S (10 s) | S (0) | S (0) |

<sup>a</sup> Abbreviations: I (t) = insoluble after t min of sonication; S (t) = clear solution after t min of sonication; s = seconds.

## 2. Screening of experimental conditions for the formation of gels with MGS-II

**Table S2** Optimization of experimental conditions for the preparation of stable gels in acetone as model solvent using MGS-II (0.128 M of **1** in DMSO and 2.4 equivalents of HCl).

| Procedure <sup>a</sup> | Remarks                                           | Result                                     |
|------------------------|---------------------------------------------------|--------------------------------------------|
| A                      | 200 $\mu$ L of acetone; 30-70 $\mu$ L of MGS-II   | Gelation                                   |
| B                      | 200 $\mu$ L of acetone; 30-70 $\mu$ L of MGS-II   | No gelation                                |
| C                      | 200 $\mu$ L of acetone; 30-50 $\mu$ L of MGS-II   | No gelation                                |
| D                      | 200 $\mu$ L of acetone; 150-200 $\mu$ L of MGS-II | No gelation                                |
| E                      | 200 $\mu$ L of acetone; 30-70 $\mu$ L of MGS-II   | No gelation (crystals formed within 5 min) |
| F                      | 200 $\mu$ L of acetone; 50-100 $\mu$ L of MGS-II  | No gelation                                |
| G                      | 200 $\mu$ L of acetone; 50 $\mu$ L of MGS-II      | No gelation                                |

<sup>a</sup> A: Addition of MGS-II to solvent at room temperature. B: Addition of solvent to MGS-II at room temperature. C: Addition of MGS-II to solvent at room temperature while gently shaking. D: Addition of solvent to higher concentration of MGS-II at room temperature. E: Solvent pre-cooled in a cooling bath (0 °C). F: Addition of warmed MGS-II to solvent or addition of warmed solvent to MGS-II. G: Ultrasonication of the mixture [MGS-II + solvent] for several minutes at room temperature.

## 3. Additional pictures of gels prepared with MGS-II in different solvents

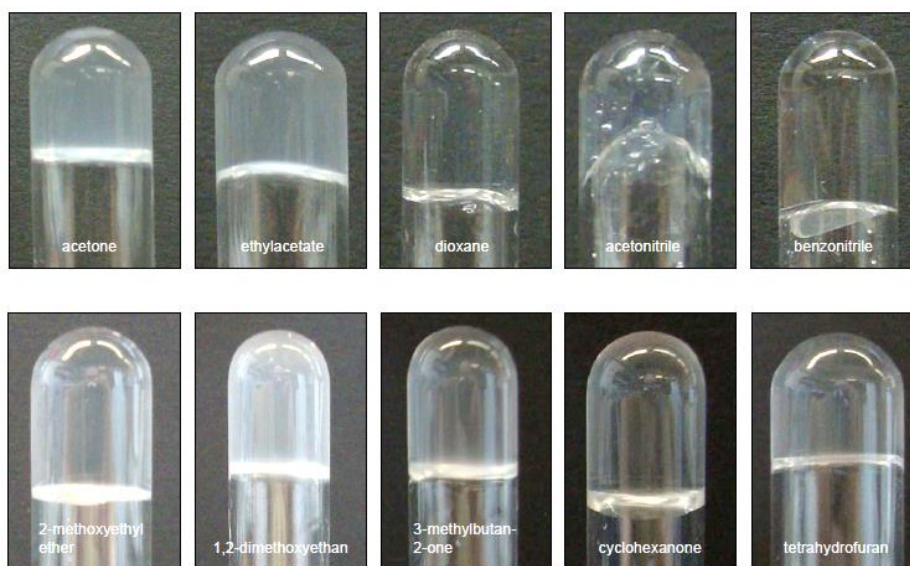

**Fig. S1** Organogels prepared with MGS-II in different solvents as depicted in Table 1.

#### 4. Effect of additional water on the stability of the gels

**Table S3** Effect of overstanding solvent in the temporal stability of the gels prepared with MGS-II as indicated in Table 1.<sup>a</sup>

| Entry | Tested solvent | Overstanding solvent | Temporal stability | Remarks                     |
|-------|----------------|----------------------|--------------------|-----------------------------|
| 1     | DME            | DME                  | 2 d - 3 d          |                             |
| 3     | DME            | water                | < 10 min           | dissolved                   |
| 4     | NM             | NM                   | 2 d                |                             |
| 6     | NM             | water                | 30 min             | 3 phases (gel + 2 solvents) |
| 7     | MEE            | MEE                  | 1 d                |                             |
| 9     | MEE            | water                | < 10 min           | dissolved                   |
| 10    | ETAC           | ETAC                 | 1 d                |                             |
| 12    | ETAC           | water                | -                  | immediately dissolved       |
| 13    | ACT            | ACT                  | -                  | precipitation and solution  |
| 15    | ACT            | water                | -                  | immediately dissolved       |
| 16    | MBN            | MBN                  | > 20 h             |                             |
| 18    | MBN            | water                | <10 min            | quickly dissolved           |
| 19    | THF            | THF                  | > 1 d              |                             |
| 21    | THF            | water                | <10 min            | quickly dissolved           |
| 22    | DCM            | DCM                  |                    |                             |
| 24    | DCM            | water                |                    |                             |
| 25    | CHN            | CHN                  |                    |                             |
| 27    | CHN            | water                | < 10 min           | 3 phases (gel + 2 solvents) |
| 28    | BN             | BN                   |                    |                             |
| 30    | BN             | water                | < 10 min           | 3 phases (gel + 2 solvents) |
| 31    | ACN            | ACN                  |                    |                             |
| 33    | ACN            | water                | -                  | immediately dissolved       |
| 34    | DOX            | DOX                  |                    |                             |
| 36    | DOX            | water                | < 10 min           | 3 phases (gel + 2 solvents) |

<sup>a</sup> Abbreviations: ACT = acetone; ACN = acetonitrile; BN = benzonitrile; CHN = cyclohexanone; DCM = dichloromethane; DME = 1,2-dimethoxyethane; DOX = 1,4-dioxane; ETAC = ethyl acetate; MBN = 3-methylbutan-2-one; MEE = 2-methoxyethyl ether; NM = nitromethane; THF = tetrahydrofuran; d = days; min = minutes.

**Table S4** Effect of additional water incorporated into MGS-II.<sup>a</sup>

| Entry | Tested solvent | Additional water [μl] | Aspect of the phase | Temporal stability | Remarks                         |
|-------|----------------|-----------------------|---------------------|--------------------|---------------------------------|
| 1     | DME            | 5                     | TG                  | few hours          | -                               |
| 2     | DME            | 10                    | S                   | -                  | -                               |
| 3     | ACT            | 5                     | PG                  | < 30 min           | -                               |
| 4     | ETAC           | 5                     | S                   | -                  | -                               |
| 5     | CHN            | 5                     | PG                  | -                  | small piece of gel              |
| 6     | NM             | 5                     | TG                  | > 14 h             | -                               |
| 7     | NM             | 10                    | TG                  | -                  | -                               |
| 8     | NM             | 20                    | S                   | -                  | -                               |
| 9     | MEE            | 5                     | TG                  | > 14 h             | -                               |
| 10    | MEE            | 10                    | TG                  | > 8 h              | -                               |
| 11    | MEE            | 20                    | S                   | -                  | -                               |
| 12    | BN             | 5                     | S                   | -                  | -                               |
| 13    | DOX            | 5                     | TG                  | very weak          | destroyed with vial upside-down |
| 14    | DOX            | 10                    | S                   | -                  | -                               |
| 15    | ACN            | 5                     | TG                  | < 30 min           | -                               |
| 16    | ACN            | 10                    | TG                  | 1 h                | -                               |
| 17    | ACN            | 20                    | S                   | -                  | -                               |
| 18    | THF            | 5                     | PG                  | -                  | -                               |
| 19    | MBN            | 5                     | S                   | -                  | -                               |
| 20    | DCM            | 5                     |                     |                    |                                 |

<sup>a</sup> Abbreviations: ACT = acetone; ACN = acetonitrile; BN = benzonitrile; CHN = cyclohexanone; DCM = dichloromethane; DME = 1,2-dimethoxyethane; DOX = 1,4-dioxane; ETAC = ethyl acetate; MBN = 3-methylbutan-2-one; MEE = 2-methoxyethyl ether; NM = nitromethane; THF = tetrahydrofuran; min = minutes; S = solution; PG = partial gel; TG = transparent or slightly translucent gel.

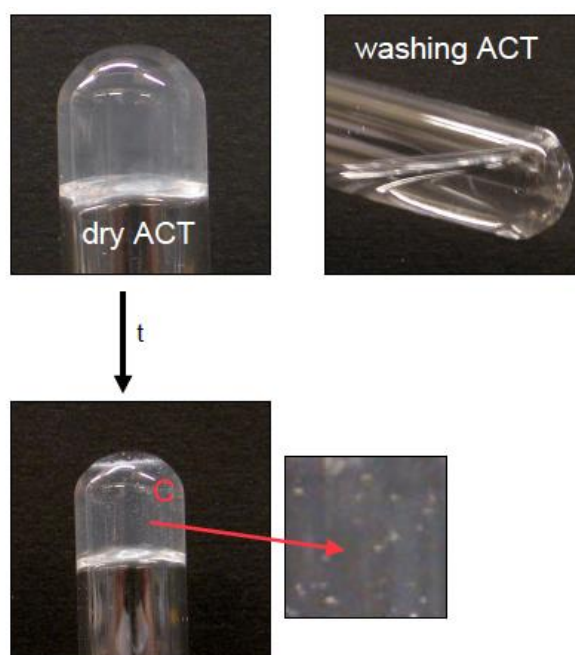

**Fig. S2** Comparison of MGS-II derived gels prepared using dry acetone and washing acetone. No gelation was achieved in the latter case. Abbreviations: ACT = acetone; t = time (aging); C = crystals.

## 5. Differential scanning calorimetry

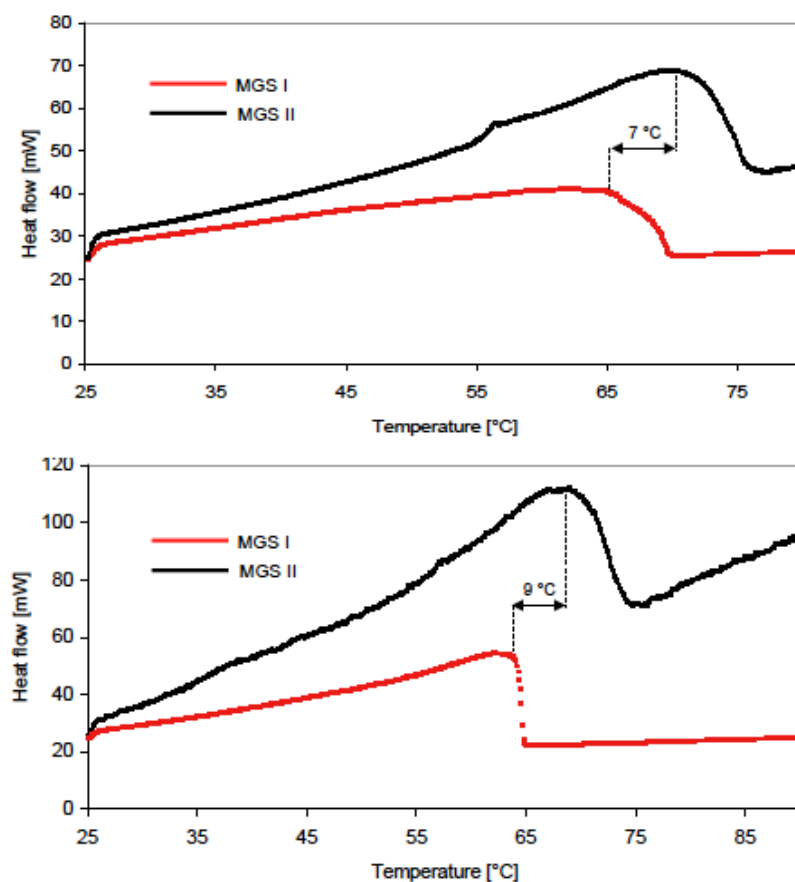

**Fig. S3** DSC thermograms showing the comparison of  $T_d$  between MGS-I and MGS-II gels from dimethoxyethane (*top*) and acetonitrile (*bottom*).

## 6. Structure-property relationships of MGS-II

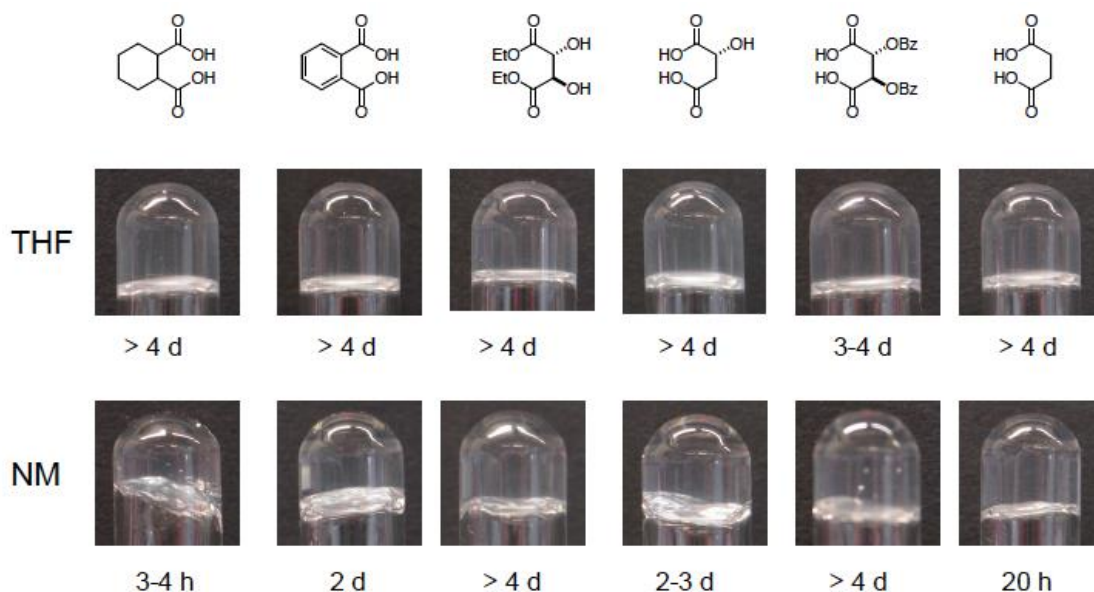

**Fig. S4** Tolerance of MGS-II toward the exchange of tartaric acid by other dicarboxylic derivatives. The temporal stability is indicated for each gel. Abbreviations: THF = tetrahydrofuran; NM = nitromethane; d = days; h = hours.

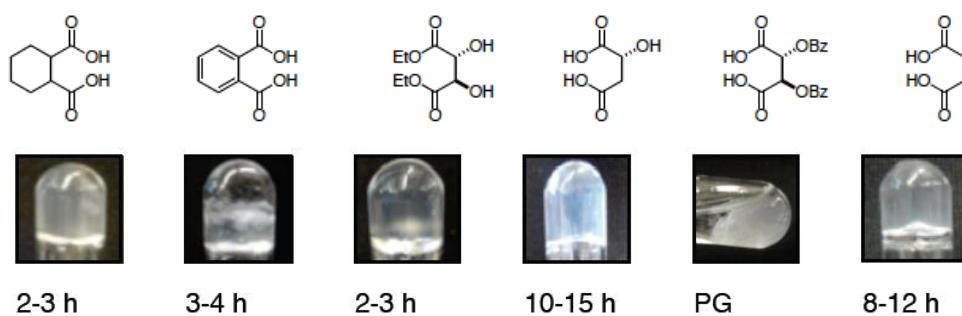

**Fig. S5** Aspect and temporal stability of the materials obtained in THF using MGS-I where the tartaric acid was exchanged by other dicarboxylic derivatives. Abbreviations: PG = partial gel; h = hours.

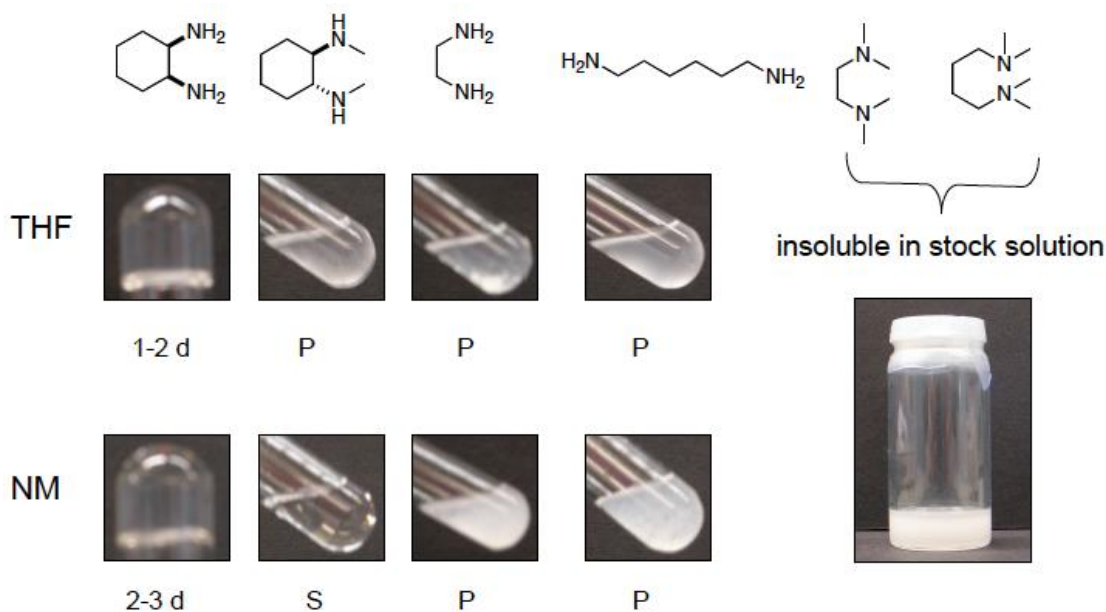

**Fig. S6** Tolerance of MGS-II toward the exchange of DAC by other diamines. Abbreviations: THF = tetrahydrofuran; NM = nitromethane; P = precipitates; S = clear solution; d = days.

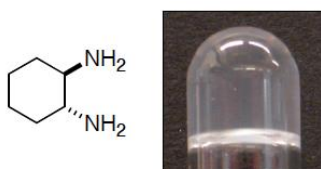

**Fig. S7** Transient gel made in THF using MGS-II prepared with (1R,2R)-1,2-diaminocyclohexane without tartaric acid counterpart. Collapse of the gel took place within 24 h.

## 7. Additional pictures of gel-to-crystal transitions

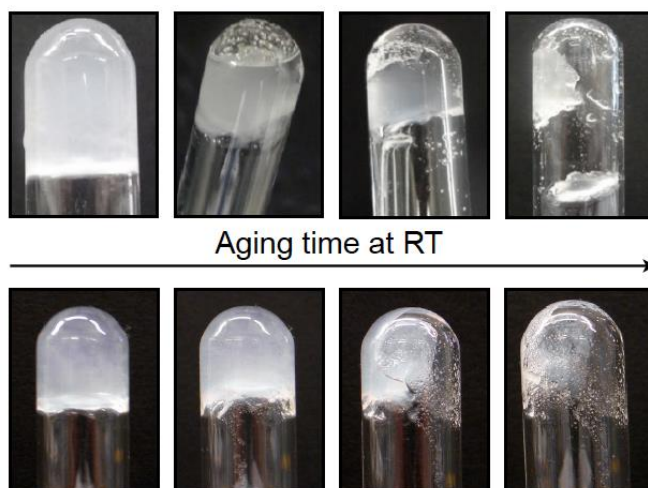

**Fig. S8** Digital photographs of a gel made from MGS-I in ethyl acetate (*top*) and from MGS-II in methylene chloride (*bottom*) over time. The gels were prepared as indicated in Table 1.

## 8. Rheological experiments

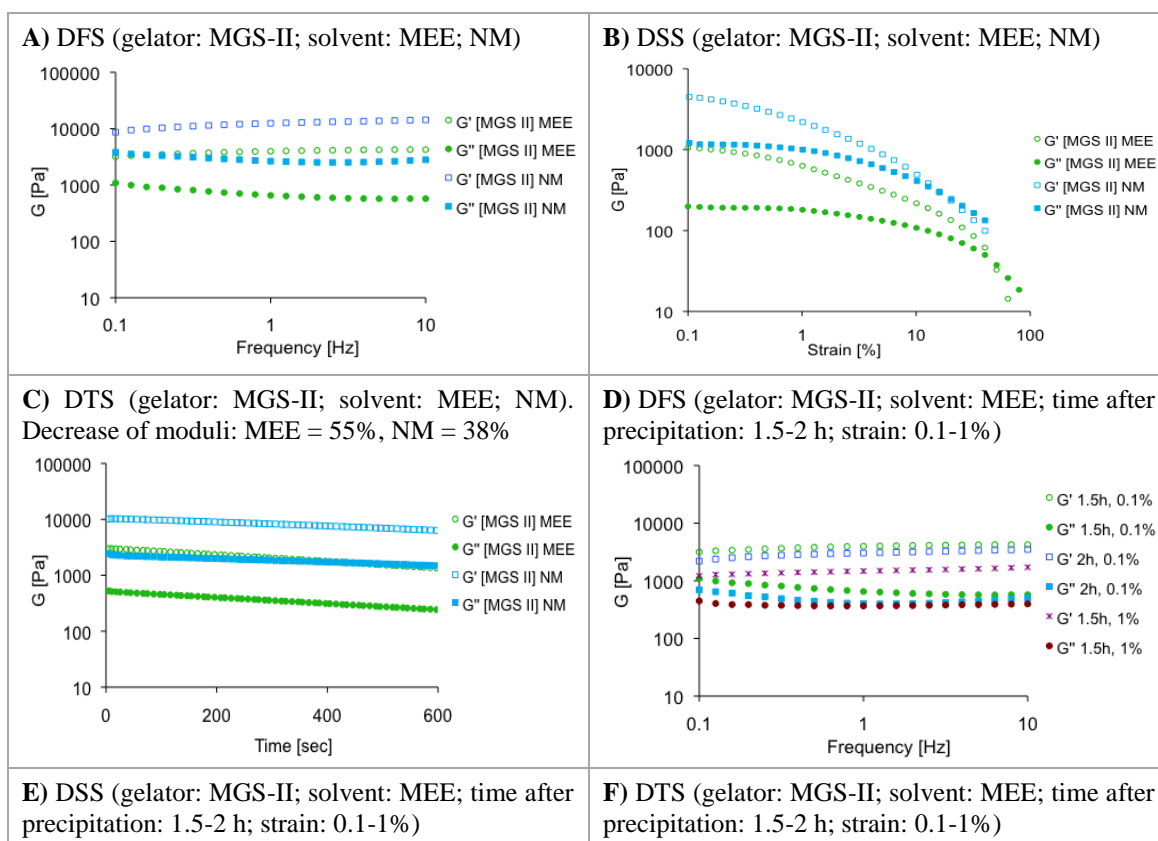



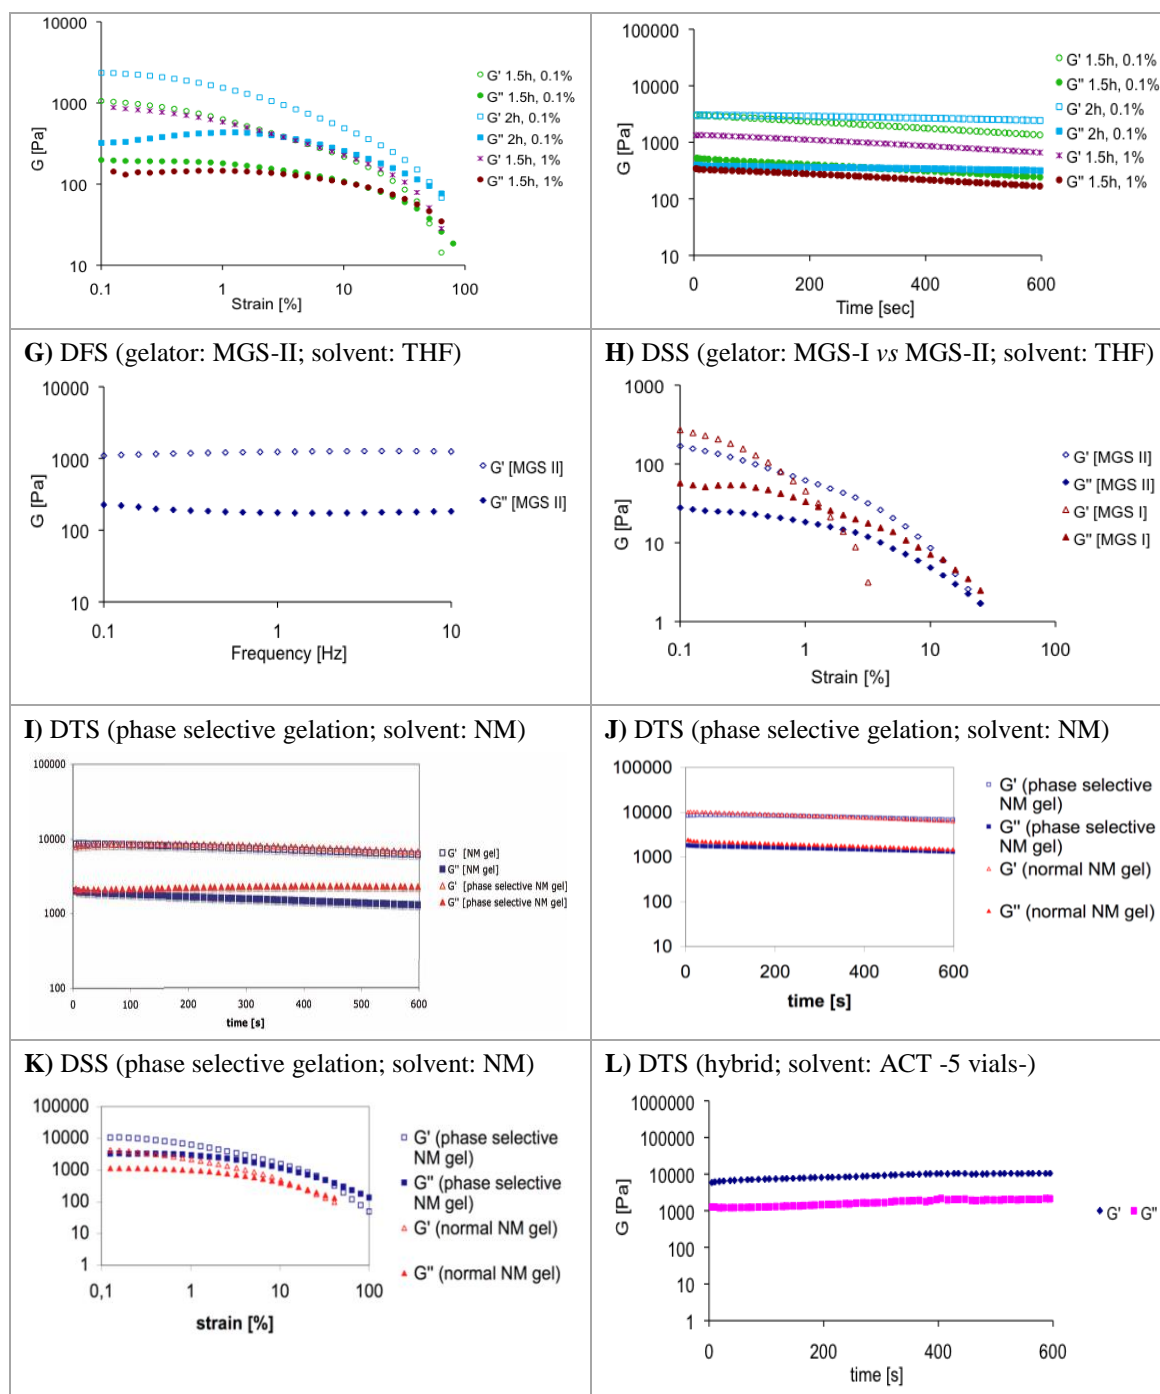

**Fig. S9** Rheological experiments of gels prepared with MGS gelators under different conditions as described in the main manuscript. Abbreviations: ACT = acetone; MEE = 2-methoxyethyl ether; NM = nitromethane; THF = tetrahydrofuran. Average of two measurements are reported. Unless otherwise indicated, frequency and strain in DTS experiments were adjusted to 1Hz and 0.1% strain, respectively.

## 9. Characterization of 2 and 3

The experimental data were identical to those reported for the MGS-I system (see reference 11 in the main text).

- (1*R*,2*R*)-1,2-Diaminocyclohexane dichloride (**2**) isolated from either (a) MGS solution or (b) after collapse of the organogels as described in the main manuscript:  $^1\text{H}$  NMR (300 MHz,  $\text{D}_2\text{O}$ )  $\delta/\text{ppm}$  = 1.33–1.40 (m, 2H,  $\text{CH}_2\text{CH}_2\text{CHN}$ ), 1.49–1.56 (m, 2H,  $\text{CH}_2\text{CH}_2\text{CHN}$ ), 1.81–1.84 (m, 2H,  $\text{CH}_2\text{CHN}$ ), 2.15–2.19 (m, 2H,  $\text{CH}_2\text{CHN}$ ), 3.38–3.43 (m, 2H, CHN), 4.79 (br s, 6H,  $\text{NH}_3$ );

$^{13}\text{C}$  NMR (75 MHz,  $\text{D}_2\text{O}$ )  $\delta/\text{ppm}$  = 22.8, 29.3, 52.2.

• L-Tartaric acid (**3**) that remains in solution during precipitation of **2**:  $^1\text{H}$  NMR (300 MHz,  $\text{D}_2\text{O}$ )  $\delta/\text{ppm}$  = 4.61 (s, 2H, OCH);  $^{13}\text{C}$  NMR (75 MHz,  $\text{D}_2\text{O}$ )  $\delta/\text{ppm}$  = 71.8, 174.4.

• Ortep diagram of the crystal structure of isolated (1*R*,2*R*)-1,2-diaminocyclohexane (**2**) (see, A. S. Abu-Surrah, T. A. K. Al-Allaf, M. Klinga and M. Ahlgren, *Polyhedron*, 2003, **22**, 1529):

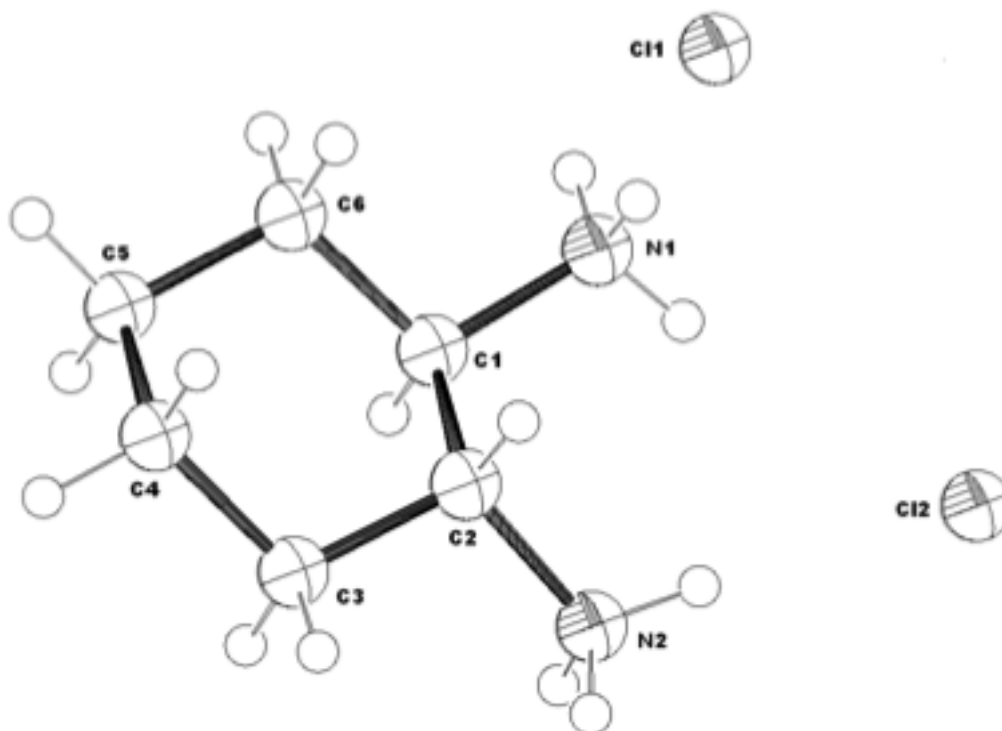

Supplement: c5ce00397k1.pdf [file c5ce00397k1.pdf]
